# Supplementary material for: β1,4-Galactosyltransferase V Modulates Breast Cancer Stem Cells through Wnt/β-catenin Signaling Pathway
Source: PubMed Central journal article supplement — Cancer Res Treat. 2020 May 27;52(4):1084–102. doi: 10.4143/crt.2020.093 (PMC7577798; doi:10.4143/crt.2020.093), 2020-05-27
Supplement: crt-2020-093-suppl2.pdf [file crt-2020-093-suppl2.pdf]

**S2 Table.** Pathological information of breast cancer tissues in the tumor microarray

| Tissue No. | Pathological Type                                                               | Pathological Staging | Clinical Staging | T   | N  | M  | Vascular Invasion | Lymph Node Infiltrated                |
|------------|---------------------------------------------------------------------------------|----------------------|------------------|-----|----|----|-------------------|---------------------------------------|
| 1          | Intraductal breast cancer                                                       | II - III             | 0                | Tis | N0 | M0 | -                 | Axillary (0/12),<br>pectoralis (0/2 ) |
| 2          | Intraductal breast cancer                                                       | II                   | 0                | Tis | N0 | M0 | -                 | 0/12                                  |
| 3          | Invasive breast cancer of no special type                                       | II - III             | 1A               | T1  | N0 | M0 | -                 | -                                     |
| 4          | Invasive breast cancer of no special type, with intraductal cancer              | II - III             | 1A               | T1  | N0 | M0 | -                 | -                                     |
| 5          | Invasive breast cancer of no special type                                       | II                   | 1A               | T1  | N0 | M0 | -                 | -                                     |
| 6          | Invasive breast cancer of no special type, locally with squamous cell carcinoma | II - III             | 1A               | T1  | N0 | M0 | -                 | Axillary (0/21),<br>subclavian (0/1)  |
| 7          | Invasive breast cancer of no special type                                       | III                  | 2A               | T2  | N0 | M0 | -                 | -                                     |
| 8          | Invasive breast cancer of no special type                                       | II - III             | 2A               | T2  | N0 | M0 | -                 | -                                     |
| 9          | Invasive breast cancer of no special type                                       | II                   | 2A               | T2  | N0 | M0 | -                 | -                                     |
| 10         | Invasive breast cancer of no special type                                       | I - II               | 2A               | T2  | N0 | M0 | -                 | -                                     |
| 11         | Invasive breast cancer of no special type                                       | II - III             | 2A               | T2  | N0 | M0 | -                 | -                                     |
| 12         | Invasive breast cancer of no special type, with invasive papillary structure    | II                   | 2A               | T2  | N0 | M0 | -                 | Axillary (0/13)                       |
| 13         | Invasive breast cancer of no                                                    | II                   | 2A               | T2  | N0 | M0 | Cancer cells are  | Axillary (0/15)                       |

|    |                                                                                        |          |    |    |    |    |                                     |                                   |
|----|----------------------------------------------------------------------------------------|----------|----|----|----|----|-------------------------------------|-----------------------------------|
|    | special type                                                                           |          |    |    |    |    | found in vessels.                   |                                   |
| 14 | Invasive breast cancer of no special type                                              | II       | 2A | T2 | N0 | M0 | -                                   | Axillary (0/19)                   |
| 15 | Invasive breast cancer of no special type, with invasive papillary structure           | II       | 2A | T2 | N0 | M0 | -                                   | Axillary (0/13)                   |
| 16 | Invasive breast cancer of no special type, with invasive lobular carcinoma             | II - III | 2A | T2 | N0 | M0 | With Vascular Invasion              | Axillary (0/7)                    |
| 17 | Invasive breast cancer of no special type                                              | II - III | 2A | T2 | N0 | M0 | Tumor thrombus is found in vessels. | Adjacent to tumor (0/3)           |
| 18 | Invasive breast cancer of no special type                                              | II - III | 2A | T2 | N0 | M0 | Tumor thrombus is found in vessels. | Axillary (0/2)                    |
| 19 | Invasive breast cancer of no special type                                              | I - II   | 2A | T2 | N0 | M0 | -                                   | Axillary (0/9)                    |
| 20 | Invasive breast cancer of no special type, partial intraductal cancer                  | II       | 2A | T2 | N0 | M0 | -                                   | Axillary (0/13)                   |
| 21 | Invasive breast cancer of no special type, partially with invasive papillary structure | II - III | 2A | T2 | N0 | M0 | -                                   | Axillary (0/12), pectoralis (0/2) |
| 22 | Invasive breast cancer of no special type                                              | II - III | 2B | T2 | N1 | M0 | -                                   | -                                 |
| 23 | Invasive breast cancer of no special type                                              | II       | 2B | T2 | N1 | M0 | -                                   | -                                 |
| 24 | Invasive breast cancer of no special type                                              | II - III | 2B | T2 | N1 | M0 | -                                   | -                                 |
| 25 | Invasive breast cancer of no special type                                              | II       | 2B | T2 | N1 | M0 | -                                   | Axillary lymph nodes              |

|    |                                                                        |          |    |    |    |    |   |                                                  |
|----|------------------------------------------------------------------------|----------|----|----|----|----|---|--------------------------------------------------|
| 26 | Invasive breast cancer of no special type                              | II - III | 2B | T2 | N1 | M0 | - | -                                                |
| 27 | Invasive breast cancer of no special type + invasive lobular carcinoma | II - III | 2B | T2 | N1 | M0 | - | -                                                |
| 28 | Invasive breast cancer of no special type + mucinous carcinoma         | II       | 2B | T2 | N1 | M0 | - | -                                                |
| 29 | Invasive breast cancer of no special type                              | II       | 2B | T2 | N1 | M0 | - | 1/14                                             |
| 30 | Invasive breast cancer of no special type                              | II       | 2B | T2 | N1 | M0 | - | Axillary (1/13)                                  |
| 31 | Invasive breast cancer of no special type                              | II       | 3A | T2 | N2 | M0 | - | -                                                |
| 32 | Invasive breast cancer of no special type                              | II       | 3A | T2 | N2 | M0 | - | -                                                |
| 33 | Invasive breast cancer of no special type                              | II       | 3A | T2 | N2 | M0 | - | -                                                |
| 34 | Invasive breast cancer of no special type                              | II       | 3A | T2 | N2 | M0 | - | -                                                |
| 35 | Invasive breast cancer of no special type                              | II       | 3A | T2 | N2 | M0 | - | Axillary (5/14)                                  |
| 36 | Invasive breast cancer of no special type                              | II - III | 3A | T2 | N2 | M0 | - | Axillary (4/10),<br>subclavian (0/3)             |
| 37 | Invasive breast cancer of no special type                              | II       | 3A | T3 | N1 | M0 | - | Ipsilateral axillary (1/17),<br>pectoralis (1/1) |
| 38 | Invasive breast cancer of no special type                              | II       | 3C | T1 | N3 | M0 | - | -                                                |
| 39 | Invasive breast cancer of no special type                              | II - III | 3C | T2 | N3 | M0 | - | -                                                |

|    |                                                                             |          |    |    |    |    |                                     |                              |
|----|-----------------------------------------------------------------------------|----------|----|----|----|----|-------------------------------------|------------------------------|
| 40 | Invasive breast cancer of no special type                                   | I - II   | 3C | T2 | N3 | M0 | -                                   | -                            |
| 41 | Invasive breast cancer of no special type + invasive micropillary carcinoma | III      | 3C | T2 | N3 | M0 | -                                   | -                            |
| 42 | Invasive breast cancer of no special type                                   | II - III | 3C | T2 | N3 | M0 | Tumor thrombus is found in vessels. | Ipsilateral Axillary (12/19) |
| 43 | Invasive breast cancer of no special type                                   | II - III | 3C | T3 | N3 | M0 | -                                   | -                            |
| 44 | Invasive breast cancer of no special type + invasive lobular carcinoma      | II       | 3C | T3 | N3 | M0 | -                                   | -                            |
| 45 | Invasive breast cancer of no special type                                   | II       | 3C | T3 | N3 | M0 | <i>lymph vessels</i>                | -                            |
